# Supplementary material
Source: publisher figshare collection journal article supplement (https://diabetesjournals.figshare.com/ndownloader/files/25491344)
Supplement: Supplementary file 1 [file 25491344]

Online-Only Supplemental Material

1. Supplemental table (p. 2)
2. Supplemental figure (p. 3)
3. Supplemental appendix (pp. 4-8)

## SUPPLEMENTAL TABLES

### *Supplemental Table 1.*

Clinical outcomes for patients with COVID-19 categorized by diabetes status (no diabetes, type 1 diabetes [T1DM], or type 2 diabetes [T2DM]). \* Lower acuity respiratory support denotes respiratory support less than endotracheal intubation and mechanical ventilation (e.g. oxygen by nasal canula, non-rebreather mask, continuous or bilevel positive airway pressure).

| Outcomes                                                     | No diabetes<br>(n = 6,138) | T1DM (n = 40) | T2DM (n = 273) |
|--------------------------------------------------------------|----------------------------|---------------|----------------|
| Hospitalization within 14 days of positive viral test, % (n) | 7.1% (435)                 | 22.5% (9)     | 44.3% (121)    |
| Severity within 14 days of positive viral test, % (n)        |                            |               |                |
| - No hospitalization                                         | 92.9% (5,703)              | 77.5% (31)    | 55.7% (152)    |
| - Hospitalization without respiratory support                | 2.1% (127)                 | 12.5% (5)     | 8.4% (23)      |
| - Lower acuity respiratory support*                          | 3.3% (204)                 | 2.5% (1)      | 21.6% (59)     |
| - ICU admission                                              | 0.6% (37)                  | 5.0% (2)      | 3.7% (10)      |
| - Endotracheal intubation                                    | 0.6% (39)                  | 2.5% (1)      | 5.9% (16)      |
| - Death                                                      | 0.5% (28)                  | 0% (0)        | 4.8% (13)      |

## SUPPLEMENTAL FIGURES

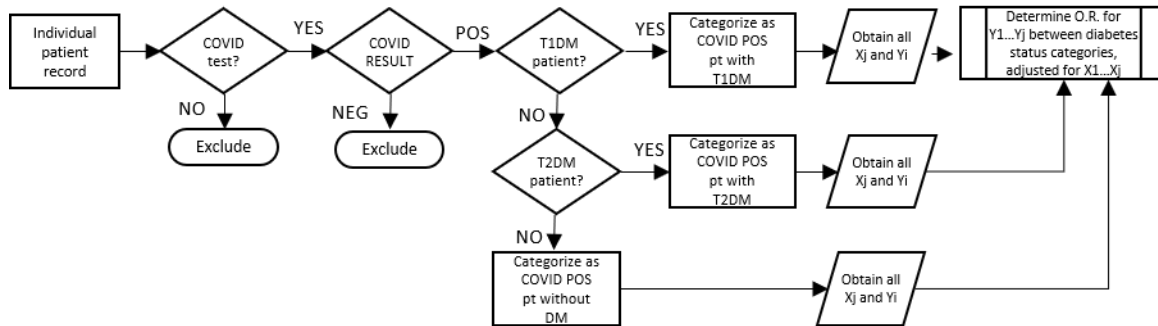

*Supplemental Figure 1: Flowsheet depicting process to identify COVID-19 cases and categorize them based on diabetes category: no diabetes mellitus (DM), type 1 diabetes (T1DM), and type 2 diabetes (T2DM).  $X_j$  = covariate of interest (e.g. age, BMI, GHb, etc).  $Y_i$  = outcome of interest (e.g. COVID-19 severity, hospitalization, diabetic ketoacidosis admission, etc.). O.R. = odds ratio.*

SUPPLEMENTAL APPENDIX

## Appendix: Inclusion and Grouping Variables, Outcomes of Interest, and Clinical Factors Collected for Data Analysis

**Appendix Table 1:** Inclusion and Grouping Variables

| Variable Name | Variable Description                                 | Function                                         | Method to Obtain Variable |
|---------------|------------------------------------------------------|--------------------------------------------------|---------------------------|
| <b>Z1</b>     | Records with any COVID-19 test                       | Requirement for record inclusion in aim 1 and 3* | EHR query                 |
| <b>Z2</b>     | Positive COVID-19 test                               | Requirement for record inclusion in aim 1 and 3* | EHR query                 |
| <b>Z3</b>     | T1DM patient **                                      | Grouping for aim 1, inclusion for aims 2-3       | EHR query                 |
| <b>Z4</b>     | T2DM patient †                                       | Grouping applicable to aims 3 and 4              | EHR query                 |
| <b>Z5</b>     | any patients that are neither T1DM nor T2DM patients | Grouping applicable to aim 1                     | EHR query                 |
| <b>Z6</b>     | Positive viral respiratory PCR panel                 | Grouping applicable to aim 2                     | EHR query                 |

\* I.e. the records of all patients analyzed must have a positive or negative COVID-19 test for inclusion in the analysis.

\*\* T1DM patient = any patient who has either any diagnosis code for T1DM or T1DM listed in the EHR problem list

† T2DM patient = any patient who has either any diagnosis code for T2DM or T2DM listed in the EHR problem list

**Appendix Table 2:** Clinical Outcomes (Dependent Variables) of Interest to be Collected for Data Analysis

| Variable Name | Variable Description                                                                                                                                                                                                                                                                                                                                                                                           | Variable Type | Method to Obtain Variable         |
|---------------|----------------------------------------------------------------------------------------------------------------------------------------------------------------------------------------------------------------------------------------------------------------------------------------------------------------------------------------------------------------------------------------------------------------|---------------|-----------------------------------|
| <b>Y1</b>     | Illness severity (whichever is greatest):<br>0 = No hospitalization,<br>1 = Hospitalization for any reason,<br>2 = Any respiratory support other than endotracheal intubation and ventilation for any reason (e.g. oxygen by nasal canula, non-rebreather mask, cpap, bipap)<br>3 = ICU admission for any reason<br>4 = Endotracheal intubation for any reason<br>5 = Death<br>within 14 days of COVID-19 test | Ordinal       | EHR query (possible chart review) |
| <b>Y2</b>     | Myocarditis for any reason within 14 days of COVID-19 test                                                                                                                                                                                                                                                                                                                                                     | Boolean       | EHR query                         |
| <b>Y3</b>     | Arrhythmia for any reason within 14 days of COVID-19 test                                                                                                                                                                                                                                                                                                                                                      | Boolean       | EHR query (possible chart review) |
| <b>Y4</b>     | Acute cardiac injury for any reason within 14 days of COVID-19 test                                                                                                                                                                                                                                                                                                                                            | Boolean       | EHR query (possible chart review) |
| <b>Y5</b>     | Acute respiratory distress syndrome for any reason within 14 days of COVID-19 test                                                                                                                                                                                                                                                                                                                             | Boolean       | EHR query (possible chart review) |
| <b>Y6</b>     | Shock for any reason within 14 days of COVID-19 test                                                                                                                                                                                                                                                                                                                                                           | Boolean       | EHR query (possible chart review) |
| <b>Y7</b>     | Hospitalization for diabetic ketoacidosis within 14 days of COVID-19 test                                                                                                                                                                                                                                                                                                                                      | Boolean       | EHR query                         |
| <b>Y8</b>     | Positive COVID-19 test (Aim 3 only)                                                                                                                                                                                                                                                                                                                                                                            | Boolean       | EHR query                         |

\* A Boolean variable has only two possible values: true or false

\*\* The EHR query retrieves outcomes directly out of the Epic EHR via the Clarity data warehouse

**Appendix Table 3:** Factors (Independent Variables) of Interest to be Collected for Data Analysis  
(table continued on following pages)

| Variable Name | Variable Description                     | Variable Type | Method to Obtain Variable                   |
|---------------|------------------------------------------|---------------|---------------------------------------------|
|               | <b>GROUPING FACTORS</b>                  |               |                                             |
| <b>X1</b>     | Diagnosis of T1DM                        | Boolean*      | EHR query**                                 |
| <b>X2</b>     | Diagnosis of T2DM                        | Boolean       | EHR query                                   |
| <b>X3</b>     | COVID-19 (+) PCR test                    | Boolean       | EHR query                                   |
| <b>X4</b>     | Date of COVID-19 PCR test                | Date          | EHR query                                   |
| <b>X5</b>     | Viral respiratory PCR (+) panel test     | Categorical   | EHR query                                   |
| <b>X6</b>     | Date of viral respiratory PCR panel test | Date          | EHR query                                   |
| <b>X7</b>     | Positive influenza A test in past year   | Boolean       | EHR query                                   |
| <b>X8</b>     | Date of positive influenza B test        | Date          | EHR query                                   |
| <b>X9</b>     | Positive influenza B test in past year   | Boolean       | EHR query                                   |
| <b>X10</b>    | Date of positive influenza B test        | Date          | EHR query                                   |
| <b>X11</b>    | Institution                              | Categorical   | Manually coded                              |
|               | <b>DEMOGRAPHIC AND SOCIAL FACTORS</b>    |               |                                             |
| <b>X12</b>    | Date of birth                            | Date          | EHR query                                   |
| <b>X13</b>    | Sex                                      | Binomial      | EHR query                                   |
| <b>X14</b>    | Race                                     | Categorical   | EHR query, chart review, or patient contact |
| <b>X15</b>    | Hispanic ethnicity                       | Boolean       | EHR query, chart review, or patient contact |
| <b>X16</b>    | Highest level of education               | Ordinal       | Patient contact                             |
| <b>X17</b>    | Household income category                | Ordinal       | Patient contact                             |
| <b>X18</b>    | Insurance (public, private, or none)     | Categorical   | EHR query                                   |
| <b>X19</b>    | Zip code                                 | Categorical   | EHR query                                   |

**Appendix Table 3 (Continued):** Factors (Independent Variables) of Interest to be Collected for Data Analysis

| Variable Name | Variable Description                                                             | Variable Type | Method to Obtain Variable                   |
|---------------|----------------------------------------------------------------------------------|---------------|---------------------------------------------|
|               | CLINICAL FACTORS                                                                 |               |                                             |
| X20           | BMI                                                                              | Scalar        | EHR query                                   |
| X21           | Weight                                                                           | Scalar        | EHR query                                   |
| X22           | Diagnosis of hypertension*                                                       | Boolean       | EHR query, chart review, or patient contact |
| X23           | Diagnosis of asthma                                                              |               | EHR query, chart review, or patient contact |
| X24           | Blood type                                                                       | Categorical   | EHR query, chart review, or patient contact |
| X25           | Rh factor                                                                        | Categorical   | EHR query, chart review, or patient contact |
| X26           | Pregnancy                                                                        | Boolean       | EHR query, chart review, or patient contact |
| X27           | Flu immunization this year                                                       | Boolean       | EHR query, chart review, or patient contact |
| X28           | Smoking status                                                                   | Ordinal       | Chart review or patient contact             |
| X29           | Taking any ACE inhibitor*                                                        | Boolean       | EHR query, chart review, or patient contact |
| X30           | Taking any angiotensin receptor blocker*                                         | Boolean       | EHR query, chart review, or patient contact |
| X31           | Taking any anti hypertension medicine other than ACE-I or ARB*                   | Boolean       | EHR query, chart review, or patient contact |
| X32           | Taking any NSAID during 72-hour period prior to COVID-19 test                    | Boolean       | Chart review or patient contact             |
| X33           | Taking any systemic glucocorticoids during 72-hour period prior to COVID-19 test | Boolean       | EHR query, chart review, or patient contact |
| X34           | Taking any antiviral medication within one week of COVID-19 test                 | Boolean       | EHR query or chart review                   |
| X35           | Any previous myocardial infarction                                               | Boolean       | EHR query, chart review, or patient contact |
| X36           | Any previous angina                                                              | Boolean       | EHR query, chart review, or patient contact |
| X37           | Any previous congestive heart failure                                            | Boolean       | EHR query, chart review, or patient contact |
| X38           | Any previous peripheral vascular disease                                         | Boolean       | EHR query, chart review, or patient contact |
| X39           | Any previous cerebrovascular disease or stroke                                   | Boolean       | EHR query, chart review, or patient contact |

**Appendix Table 3 (Continued):** Factors (Independent Variables) of Interest to be Collected for Data Analysis

| Variable Name | Variable Description                                                                                                  | Variable Type | Method to Obtain Variable                   |
|---------------|-----------------------------------------------------------------------------------------------------------------------|---------------|---------------------------------------------|
|               | DIABETES RELATED CLINICAL FACTORS                                                                                     |               |                                             |
| X40           | Hemoglobin A1c                                                                                                        | Scalar        | EHR query, chart review or patient contact  |
| X41           | T1DM or T2DM duration                                                                                                 | Scalar        | Chart review or patient contact             |
| X42           | Number of DKA admissions in the previous year                                                                         | Integer       | Chart review or patient contact             |
| X43           | Using a blood glucose meter, continuous glucose meter, or unknown over the prior 14 days                              | Categorical   | Chart review or patient contact             |
| X44           | Using an insulin pump, multiple daily injections, split-mixed, no insulin regimen, or unknown, over the prior 14 days | Categorical   | Chart review or patient contact             |
| X45           | Has had an established relationship with an endocrinologist within the past year                                      | Boolean       | Chart review or patient contact             |
| X46           | Any known nephropathy <sup>†</sup>                                                                                    | Boolean       | EHR query, chart review, or patient contact |
| X47           | Any known retinopathy <sup>‡</sup>                                                                                    | Boolean       | EHR query, chart review, or patient contact |
| X48           | Any known neuropathy <sup>§</sup>                                                                                     | Boolean       | EHR query, chart review, or patient contact |
|               | COVID-19-RELATED STRESSORS                                                                                            |               |                                             |
| X49           | Degree routine was altered*                                                                                           | Ordinal       | Patient contact                             |
| X50           | Effect on ability to get diabetes supplies*                                                                           | Ordinal       | Patient contact                             |
| X51           | Degree of stress from COVID-19*                                                                                       | Ordinal       | Patient contact                             |

\* A Boolean variable has only two possible values: true or false

\*\* The EHR query retrieves outcomes directly out of the Epic EHR via the Clarity data warehouse

<sup>†</sup> Defined as most recent HbA1c in the past 12 months from the time of COVID-19 test

<sup>‡</sup> Defined as “diabetic nephropathy” in patient problem list, OR patient report of “diabetic kidney disease = true” on patient contact

<sup>§</sup> Defined as “diabetic retinopathy” in patient problem list, description of retinopathy on chart review OR “diabetic eye disease” on patient contact
